# Supplementary material for: Formation and investigation of dual cross-linked high temperature proton exchange membranes based on vinylimidazolium-functionalized poly(2,6-dimethyl-1,4-phenylene oxide) and polystyrene
Source: Royal Society of Chemistry journal article supplement (doi:10.1039/c8py01148f), 2018-01-01
Supplement: c8py01148f1.pdf [file c8py01148f1.pdf]

Supporting Information

**Formation and investigation of dual cross-linked high temperature  
proton exchange membranes based on vinylimidazolium-  
functionalized poly(2,6-dimethyl-1,4-phenylene oxide) and  
polystyrene**

Jingshuai Yang, Haoxing Jiang, Liping Gao, Jin Wang, Niya Ye, Yixin Xu and

Ronghuan He\*

Department of Chemistry, College of Sciences, Northeastern University, Shenyang

110004, China.

Email: herh@mail.neu.edu.cn. Fax: +86-24-83676698; Tel.: +86-24-83683429.

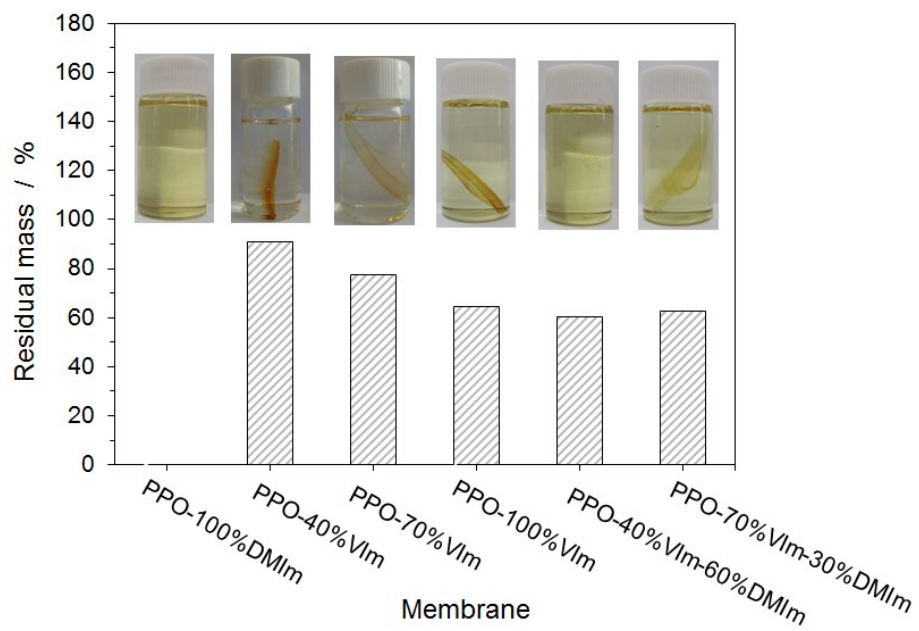

Fig. S1 Residual mass and photographs of the membranes after the solubility test in NMP at 70 °C for 24 h.

Table S1 Comparisons of the ADC, conductivity and tensile strength at break of various membranes

| Membrane           | ADC%  | Conductivity<br>@180°C/ S cm <sup>-1</sup> | Tensile strength @RT<br>/ MPa |
|--------------------|-------|--------------------------------------------|-------------------------------|
| PPO-70%VIm         | 147.1 | 0.052                                      | 5.9                           |
| PPO-100%VIm        | 139.9 | 0.045                                      | 7.9                           |
| PPO-40%VIm-60%DMIm | 192.4 | 0.071                                      | 3.3                           |
| PPO-70%VIm-30%DMIm | 180.1 | 0.067                                      | 5.0                           |
| PSf-Im-70* [1]     | 236   | 0.048@130°C                                | 4.2                           |
| SPVIM-60* [2]      | ~146  | 0.017@150°C                                | ~1.9                          |
| PPO-BIm-65-15* [3] | 438   | 0.041                                      | 2.8                           |

\* PSf-Im: poly(arylene ether sulfone) containing pendent imidazole groups; SPVIM:sulfonated polymerizable (styrene, acrylonitrile and vinylimidazole); PPO-BIm: ,4-bis(bromomethyl)benzene crosslinked imidazolium PPO.

## Reference

- 1 J. Wang, J. Zheng, Z. Zhao, S. Zhang, J. Mater. Chem., 2012, **22**, 22706.
- 2 Z. Si, F. Gu, J. Guo, F. Yan, J. Polym. Sci. B Polym. Phys., 2013, **51**, 1311.
- 3 Q. Li, L. Liu, S. Liang, Q. Li, B. Jin, R. Bai. Polym. Chem. 2014, **5**, 2425.

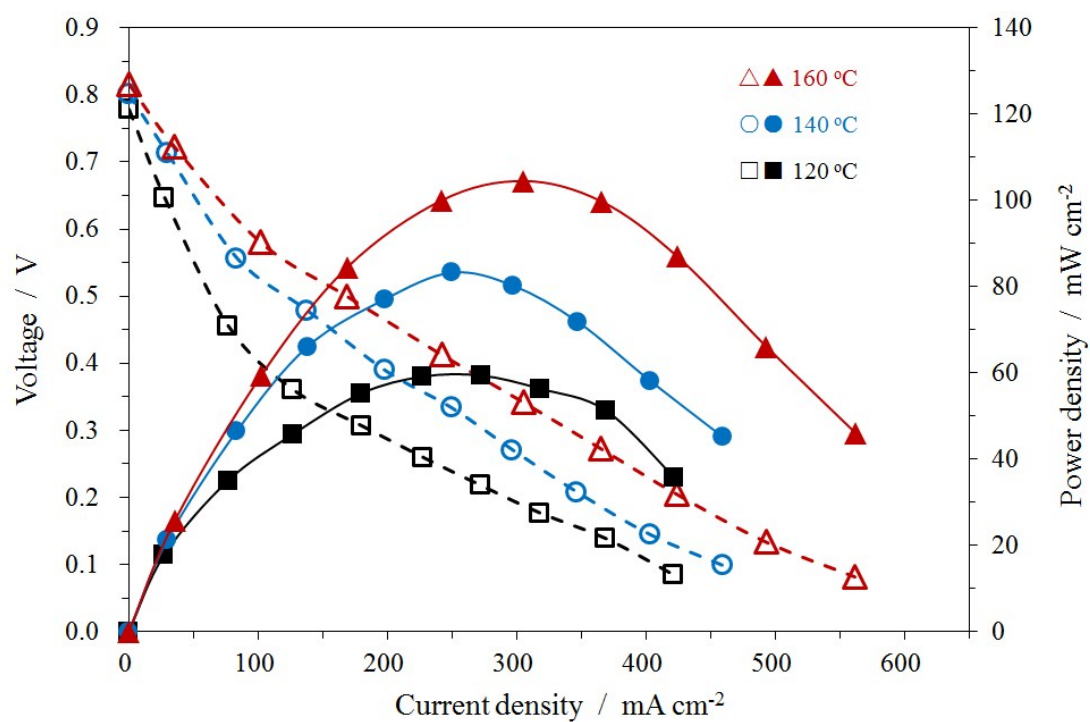

Fig. S2 Polarization curves (open symbols) and power densities (solid symbols) of the fuel cell based on PPO-70%VIm-30%DMIm/180.1%PA membrane supplying un-humidified hydrogen and oxygen at elevated temperatures with a catalyst loading of 0.65 mg Pt cm<sup>-2</sup> for each electrode.
